# Supplementary material
Source: Frontiers journal article supplement (https://www.frontiersin.org/articles/292874)
Supplement: Table_2.pdf [file Table_2.pdf]

**Table S2. Gene expression levels (Transcripts per million) of flowering genes in the SAM of lettuce line S39 at different stages isolating by laser capture microdissection and detected by RNA-Seq.**

| <b>ID (Model name)</b>              | <b>Stage 1</b> | <b>Stage 2</b> | <b>Stage 3</b>  | <b>Stage 4</b>   |
|-------------------------------------|----------------|----------------|-----------------|------------------|
| <b>Last_1_v5_gn_7_6780 (LsSOC1)</b> | <b>25±2</b>    | <b>342±42</b>  | <b>1142±258</b> | <b>1406±371</b>  |
| <b>Lsat_1_v5_gn4_84380 (LsLFY)</b>  | <b>22±1</b>    | <b>28±10.5</b> | <b>147±21.5</b> | <b>19678±287</b> |

Note: values are means of two biological replicates, ±sd.
